# Supplementary material for: Association of antinuclear antibody seropositivity with inhaled environmental exposures in patients with interstitial lung disease
Source: PubMed Central journal article supplement — ERJ Open Res. 2021 Nov 8;7(4):00254-2021. doi: 10.1183/23120541.00254-2021 (PMC8573239; doi:10.1183/23120541.00254-2021), 2021-11-08
Supplement: 00254-2021.SUPPLEMENT.pdf [file 00254-2021.SUPPLEMENT.pdf]

### Supplementary Figure S1.

ROC curves for ANA-IFA and ANA-EIA for the common period between 5 January and 23 February 1995, to truly reflect the patient population at University of California at San Francisco ( $P =$  not significant)

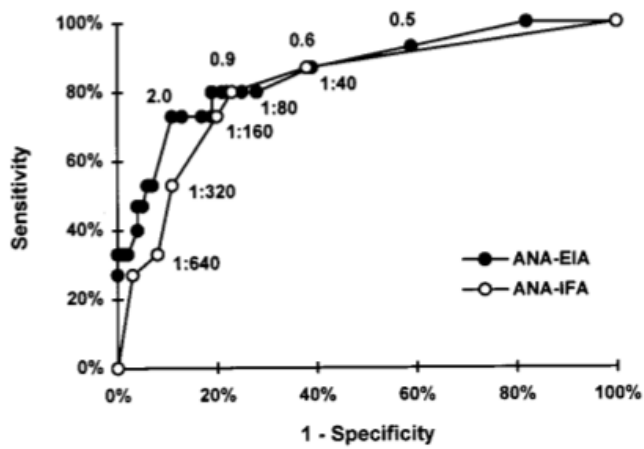

**Supplementary Table S1. Baseline Demographics of Patients with ILD by Center**

| <b><u>Characteristic</u></b> | <b>University of Chicago</b> |                     |                | <b>Northshore University HealthSystem</b> |                     |                |
|------------------------------|------------------------------|---------------------|----------------|-------------------------------------------|---------------------|----------------|
|                              | <b>ANA Positive</b>          | <b>ANA Negative</b> | <b>P-value</b> | <b>ANA Positive</b>                       | <b>ANA Negative</b> | <b>P-value</b> |
| Age, years (SD)              | 64.2 (12.3)                  | 54.2 (11.8)         | 0.966          | 62.4 (12.6)                               | 68.0 (12.2)         | 0.015          |
| Male, n (%)                  | 357 (50.6)                   | 187 (55.0)          | 0.187          | 5 (13.9)                                  | 73 (39.7)           | 0.004          |
| BMI, mean (SD)               | 29.6 (6.6)                   | 30.2 (6.8)          | 0.015          | 29.5 (5.7)                                | 29.0 (5.8)          | 0.691          |
| Caucasian, n (%)             | 490 (69.5)                   | 274 (80.6)          | <0.001         | 25 (69.4)                                 | 129 (70.1)          | 1.000          |
| African American, n (%)      | 141 (20.0)                   | 41 (12.1)           | 0.002          | 6 (16.7)                                  | 15 (8.2)            | 0.124          |
| Hispanic, n (%)              | 50 (7.1)                     | 15 (4.4)            | 0.093          | 0 (0.0)                                   | 0 (0.0)             | N/A            |
| Asian, n (%)                 | 24 (3.4)                     | 10 (2.9)            | 0.693          | 1 (2.8)                                   | 12 (6.5)            | 0.699          |
| Other, n (%)                 | 0 (0.0)                      | 0 (0.0)             | N/A            | 4 (11.1)                                  | 28 (15.2)           | 0.615          |
| <b><u>Lung Function</u></b>  |                              |                     |                |                                           |                     |                |
| TLC %, mean (SD)             | 68.6 (17.0)                  | 69.9 (17.0)         | 0.306          | 76.4 (18.3)                               | 83.7 (22.0)         | 0.096          |
| FVC %, mean (SD)             | 63.9 (18.5)                  | 65.5 (18.0)         | 0.209          | 67.7 (15.8)                               | 76.8 (19.8)         | 0.013          |
| DLCO %, mean (SD)            | 50.1 (21.9)                  | 51.8 (20.9)         | 0.265          | 48.7 (18.8)                               | 54.0 (23.0)         | 0.239          |
| <b><u>ILD Subtype</u></b>    |                              |                     |                |                                           |                     |                |
| IPF, n (%)                   | 202 (28.7)                   | 126 (37.1)          | 0.007          | 10 (27.8)                                 | 64 (34.8)           | 0.448          |
| IAPAF, n (%)                 | 140 (19.9)                   | 31 (9.1)            | <0.001         | 1 (2.8)                                   | 5 (2.7)             | 1.000          |
| CTD-ILD, n (%)               | 172 (24.4)                   | 58 (17.1)           | 0.008          | 5 (13.9)                                  | 5 (2.7)             | 0.012          |
| HP, n (%)                    | 82 (11.6)                    | 49 (14.4)           | 0.231          | 0 (0.0)                                   | 10 (5.4)            | 0.374          |
| Other ILD, n (%)             | 18 (2.6)                     | 18 (5.3)            | 0.029          | 11 (30.5)                                 | 49 (26.6)           | 0.683          |
| Unclassifiable ILD, n (%)    | 91 (12.8)                    | 58 (17.0)           | 0.074          | 9 (25.0)                                  | 51 (27.8)           | 0.839          |

TLC = total lung capacity; FVC = forced vital capacity; DLCO = diffusion capacity for carbon monoxide  
 IPF = idiopathic pulmonary fibrosis; IAPAF = interstitial pneumonia with autoimmune features; CTD-ILD =  
 Connective tissue disease associated ILD; HP = hypersensitivity pneumonitis; ILD = interstitial lung disease.  
 Other ILD include pneumoconiosis, lymphocytic interstitial pneumonia, Langerhans cell histiocytosis, cryptogenic  
 organizing pneumonia, lymphangiomyomatosis, and other less common ILDs with small sample sizes.

\*P value based on univariate analysis for categorical variables. For example, Caucasian compared to non-Caucasian, IPF compared to non-IPF patients, etc. P value based on two-tailed student t test for continuous variables. For example, age, BMI.

Exception for participants: Age, n=1265; gender, n=1265; ANA serologies, n=1265; BMI, n=1122; TLC, n=989; FVC, n=1162; DLCO, n=1115; and other ILD, n=95.

**Supplementary Table S2. Variable Count for Baseline Demographics of ILD Cohort by Center and ANA Seropositivity**

|                    | <b>University of Chicago<br/>(n = 1045)</b> | <b>Northshore University<br/>HealthSystem (n = 220)</b> | <b>P-value</b> |
|--------------------|---------------------------------------------|---------------------------------------------------------|----------------|
| TLC, n(%)          | 818 (78.3)                                  | 171 (77.7)                                              | 0.858          |
| FVC, n(%)          | 958 (91.7)                                  | 204 (92.7)                                              | 0.685          |
| DLCO, n(%)         | 940 (90.0)                                  | 175 (79.5)                                              | <0.001         |
| Age, n(%)          | 1045 (100.0)                                | 220 (100.0)                                             | 1.000          |
| Gender, n(%)       | 1045 (100.0)                                | 220 (100.0)                                             | 1.000          |
| BMI, n(%)          | 902 (86.3)                                  | 220 (100.0)                                             | <0.001         |
| ANA serology, n(%) | 1045 (100.0)                                | 220 (100.0)                                             | 1.000          |
|                    | <b>ANA Seropositive (n = 741)</b>           | <b>ANA Seronegative (n= 524)</b>                        | <b>P-value</b> |
| TLC, n(%)          | 594 (80.2)                                  | 395 (75.4)                                              | 0.045          |
| FVC, n(%)          | 684 (92.3)                                  | 478 (91.2)                                              | 0.531          |
| DLCO, n(%)         | 668 (90.1)                                  | 447 (85.3)                                              | 0.010          |
| Age, n(%)          | 741 (100.0)                                 | 524 (100.0)                                             | 1.000          |
| Gender, n(%)       | 741 (100.0)                                 | 524 (100.0)                                             | 1.000          |
| BMI, n(%)          | 661 (89.2)                                  | 459 (87.6)                                              | 0.420          |
| ANA serology, n(%) | 741 (100.0)                                 | 524 (100.0)                                             | 1.000          |

*TLC = total lung capacity; FVC = forced vital capacity; DLCO = diffusion capacity for carbon monoxide*

**Supplementary Table S3. Prevalence of organic exposures among patients with and without a diagnosis of HP.**

| <b>Exposure</b>            | <b>HP</b>   | <b>Non-HP</b> | <b>Total</b> | <b>P-value</b> |
|----------------------------|-------------|---------------|--------------|----------------|
| Organic Exposure, n (%)    | 95 (67.4)   | 370 (32.9)    | 465          | <0.001         |
| No Organic Exposure, n (%) | 46 (32.6)   | 754 (67.1)    | 800          |                |
| Total, n (%)               | 141 (100.0) | 1124 (100.0)  | 1265         |                |

*HP = hypersensitivity pneumonitis*

**Supplementary Table S4. Prevalence of patients with available documentation of radiographic emphysema and smoking history amongst individuals with unclassifiable ILD\***

| <b><u>All Unclassifiable ILD</u></b>                                 | ANA Seropositive | ANA Seronegative | Total       | P- value |
|----------------------------------------------------------------------|------------------|------------------|-------------|----------|
| Emphysema, n (%)                                                     | 24 (31.6)        | 12 (26.1)        | 36 (29.5)   | 0.519    |
| No emphysema, n (%)                                                  | 52 (68.4)        | 34 (73.9)        | 86 (70.5)   |          |
| Total, n (%)                                                         | 76 (100.0)       | 46 (100.0)       | 122 (100.0) |          |
| <b><u>Unclassifiable ILD with significant smoking history</u></b>    |                  |                  |             |          |
| Emphysema, n (%)                                                     | 16 (50.0)        | 4 (23.5)         | 20 (40.8)   | 0.073    |
| No emphysema, n (%)                                                  | 16 (50.0)        | 13 (76.5)        | 29 (59.2)   |          |
| Total, n (%)                                                         | 32 (100.0)       | 17 (100.0)       | 49 (100.0)  |          |
| <b><u>Unclassifiable ILD without significant smoking history</u></b> |                  |                  |             |          |
| Emphysema, n (%)                                                     | 8 (18.2)         | 8 (27.6)         | 16 (21.9)   | 0.342    |
| No emphysema, n (%)                                                  | 36 (81.8)        | 21 (72.4)        | 57 (78.1)   |          |
| Total, n (%)                                                         | 44 (100.0)       | 29 (100.0)       | 73 (100.0)  |          |

\*Significant smoking history was regarded as patients with  $\geq 10$  pack year history of tobacco use.  
ILD = interstitial lung disease

**Supplementary Table S5. Prevalence of ANA seropositivity in patients with available documentation for a secondary diagnosis of pneumoconiosis**

|                          | ANA Seropositive | ANA Seronegative | Total        | <i>P</i> -value |
|--------------------------|------------------|------------------|--------------|-----------------|
| <b><i>All ILD</i></b>    |                  |                  |              |                 |
| Pneumoconiosis, n (%)    | 64 (9.1)         | 21 (6.2)         | 85 (8.1)     | 0.120           |
| No pneumoconiosis, n (%) | 641 (90.9)       | 319 (93.8)       | 960 (91.9)   |                 |
| Total, n (%)             | 705 (100.0)      | 340 (100.0)      | 1045 (100.0) |                 |
| <b><i>Other ILD</i></b>  |                  |                  |              |                 |
| Pneumoconiosis, n (%)    | 5 (27.8)         | 1 (5.6)          | 6 (16.7)     | 0.074           |
| No pneumoconiosis, n (%) | 13 (72.2)        | 17 (94.4)        | 30 (83.3)    |                 |
| Total, n (%)             | 18 (100.0)       | 18 (100.0)       | 36 (100.0)   |                 |

*ILD = interstitial lung disease*
